# Supplementary material
Source: MDPI journal article supplement (https://www.mdpi.com/1424-2818/14/4/303)
Supplement: s1 [file s1]

# Factors of Detection Deficits in Vascular Plant Inventories—An Island Case Study

Michael Ristow, Maria Panitsa, Stefan Meyer, and Erwin Bergmeier

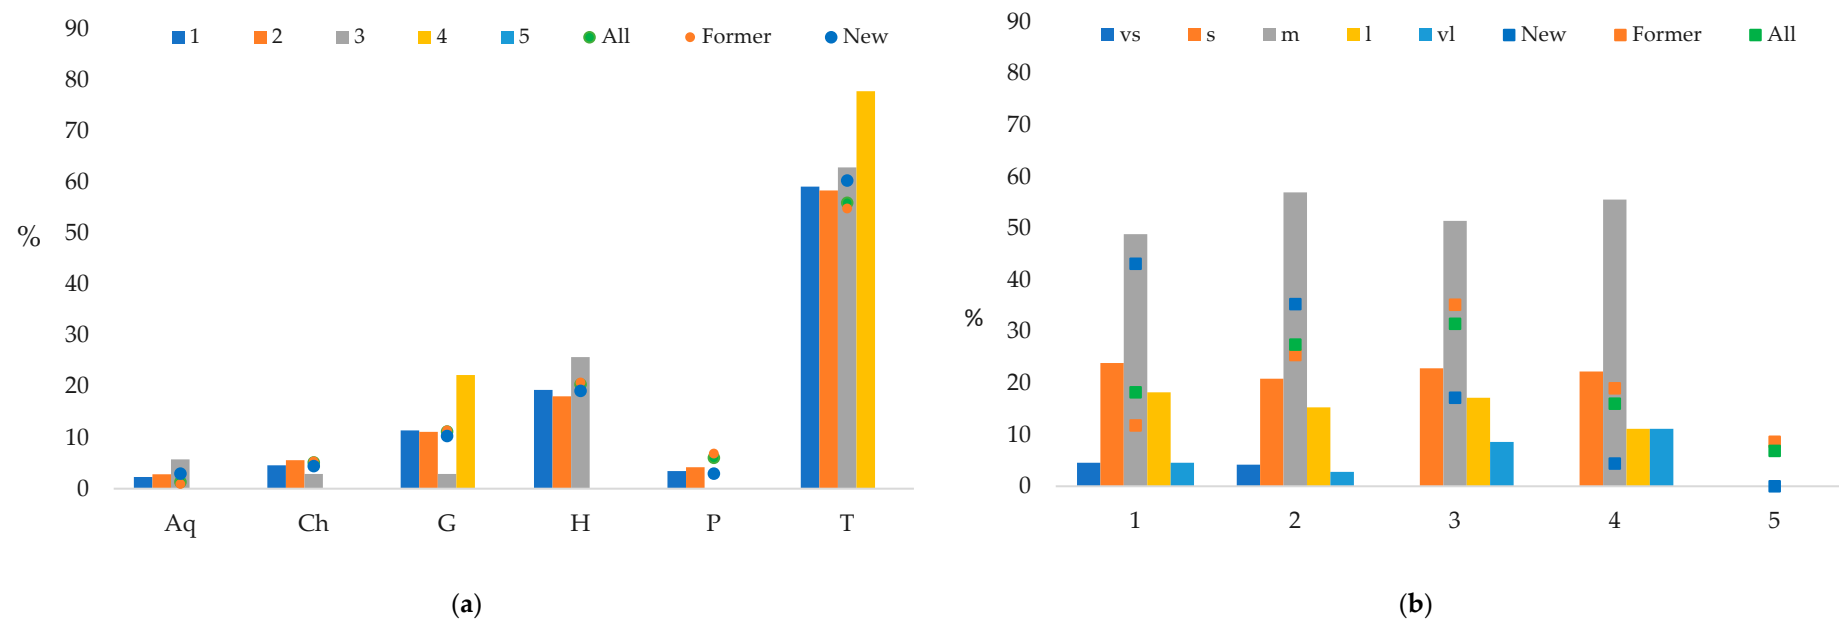

**Figure S2.** (a) Percentages of life forms of newly detected (new) and of formerly known taxa (former) per rarity degree (1-5) separately in comparison with those of the whole flora (All), all newly detected (new) and formerly known (former) taxa; (b) Proportions of different size types of the newly detected taxa per rarity degree (separately) and in comparison, with the proportions of different size types in all newly detected, all formerly known and all (new and former) taxa. Abbreviations as in Figures 2, 3, 6.
