# Supplementary material
Source: MDPI journal article supplement (https://www.mdpi.com/1424-2818/14/4/303)
Supplement: s1 [file s1]

# Factors of Detection Deficits in Vascular Plant Inventories – An Island Case Study

Michael Ristow, Maria Panitsa, Stefan Meyer, and Erwin Bergmeier

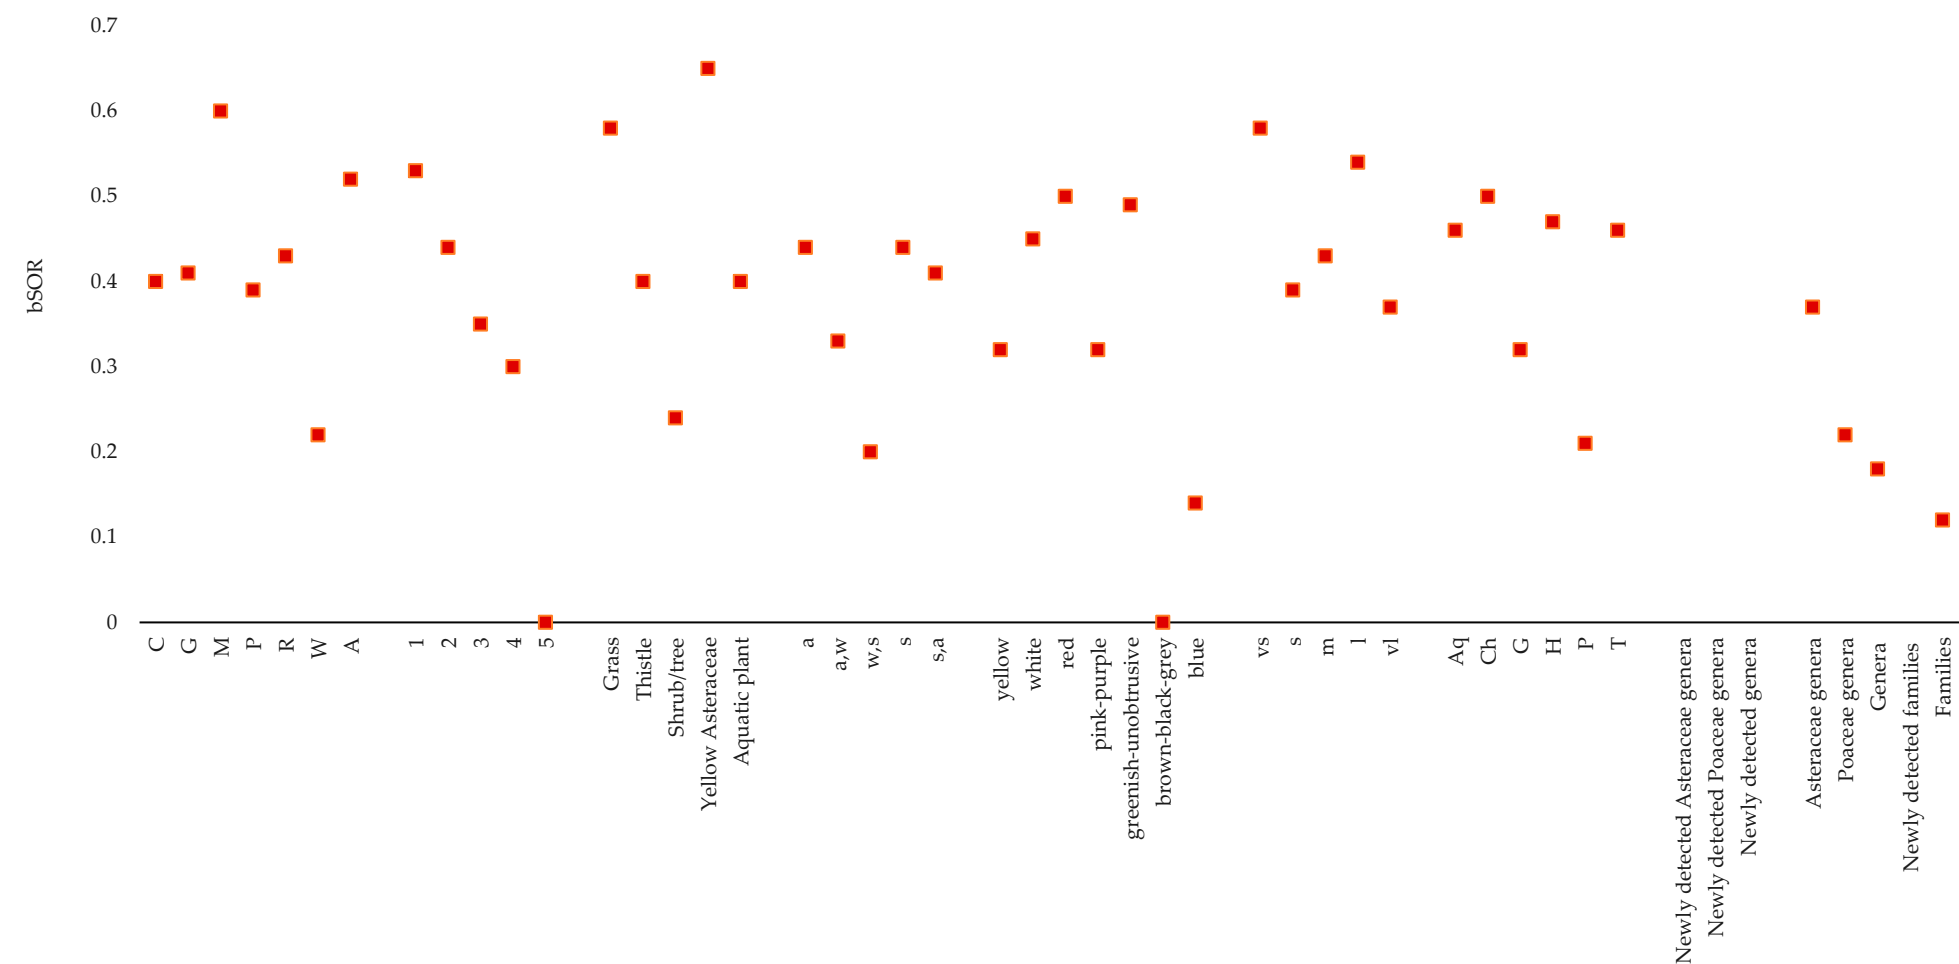

**Figure S3.** Values of  $bs_{OR}$  (red squares) calculated between historical and recent plant taxa surveys for habitat preferences (C, G, M, P, R, W, A), rarity (1-5), perceptability, reproduction period (a, w, s), flower colour, size (vs, s, m, l, vl), life forms (Aq, Ch, G, H, P, T), genera and families. Abbreviations as in Figures 2,3, 5, 6, 7 & 9. The  $bs_{OR}$  (Sørensen dissimilarity index) is formulated as:

$$\frac{\left[ \sum_{i < j} \min(b_{ij}, b_{ji}) \right]}{\left[ \sum_i S_i - S_T \right] + \left[ \sum_{i < j} \min(b_{ij}, b_{ji}) \right]},$$

where  $S_i$  is the total number of taxa in site  $i$ ,  $S_T$  is the total number of taxa in all sites considered together and  $b_{ij}$ ,  $b_{ji}$  are the number of taxa exclusive to sites  $i$  and  $j$ , respectively, when compared in pairs (please see M & Ms).
