# Supplementary material
Source: MDPI journal article supplement (https://www.mdpi.com/1424-2818/14/4/303)
Supplement: s1 [file s1]

# Factors of Detection Deficits in Vascular Plant Inventories—An Island Case Study

Michael Ristow, Maria Panitsa, Stefan Meyer, and Erwin Bergmeier

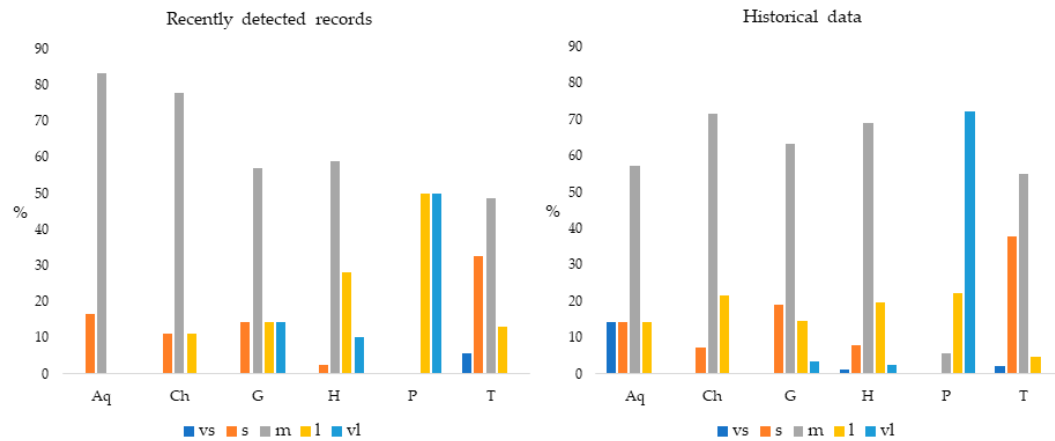

**Figure S1.** Proportions (%) of plants' size in different life form categories. Life form categories: Aq = hydrophytes, Ch = chamaephytes, G = geophytes, H = hemicryptophytes, P = phanerophytes, T = therophytes. Plant size categories: vs: very small <0.05m, s: small 0.5-0.15m, m: medium 0.15-0.5m, l: large 0.5-1.8m, vl: very large > 1.8.
